# Supplementary material for: Facilitation of Dye-Based Quantitative Real-Time Polymerase Chain Reaction with Poly(ethylene glycol)-Engrafted Graphene Oxide
Source: MDPI journal article supplement (doi:10.3390/nano13081348), 2023-04-12
Supplement: s1 [file s1]

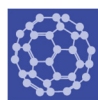

## Supplementary Materials

# Facilitation of Dye-Based Quantitative Real-Time Polymerase Chain Reaction with Poly(ethylene glycol)-Engrafted Graphene Oxide

Khushbu Chauhan, Dong-Min Kim, Eunbin Cho and Dong-Eun Kim \*

Department of Bioscience and Biotechnology, Konkuk University, 120 Neundong-ro, Gwangjin-gu, Seoul 05029, Republic of Korea

\* Correspondence: kimde@konkuk.ac.kr

Table S1. Oligonucleotides used in the study.

| Primer              |   | Amplicon size (bp) | Sequence (5'-3')                  |
|---------------------|---|--------------------|-----------------------------------|
| Influenza B (IFZ B) | F | 391                | CTC CAT AGA GGT TCT TCA TTT GGG T |
| Influenza B (IFZ B) | R | 391                | ACA CCT TCT GCG AAA GCT TCA ATA C |
| Influenza A (IFZ A) | F | 193                | TTC AGA CAA TGG AAC GTG TTA CCC   |
| Influenza A (IFZ A) | R | 193                | AGA AGC TTT TTG CTC CAG CAT GAG   |

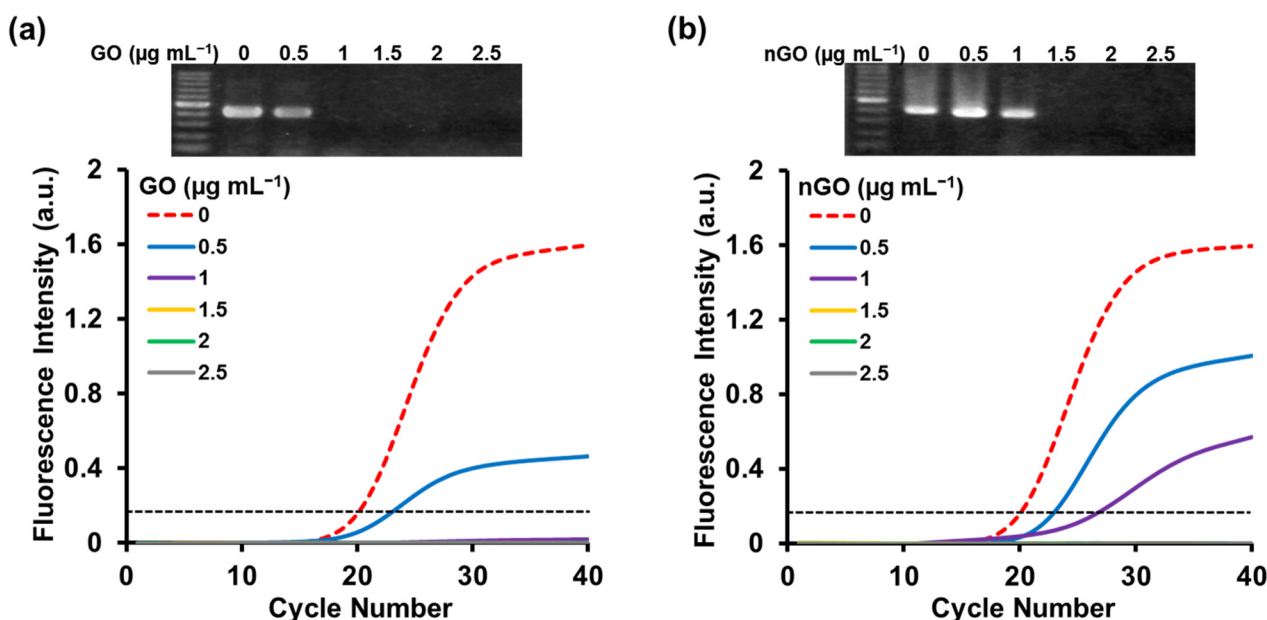

**Figure S1.** Real-time fluorescence monitoring of target RNA (IFZ B) amplification with GO and nGO. (a) Agarose gel electrophoretic analysis (top panel) and fluorescent amplification signals with various concentrations of GO (0, 0.5, 1, 1.5, 2, and 2.5 µg mL<sup>-1</sup>). (b) Agarose gel electrophoretic analysis (top panel) and fluorescent amplification signals with various concentrations of nGO (0, 0.5, 1, 1.5, 2, and 2.5 µg mL<sup>-1</sup>).

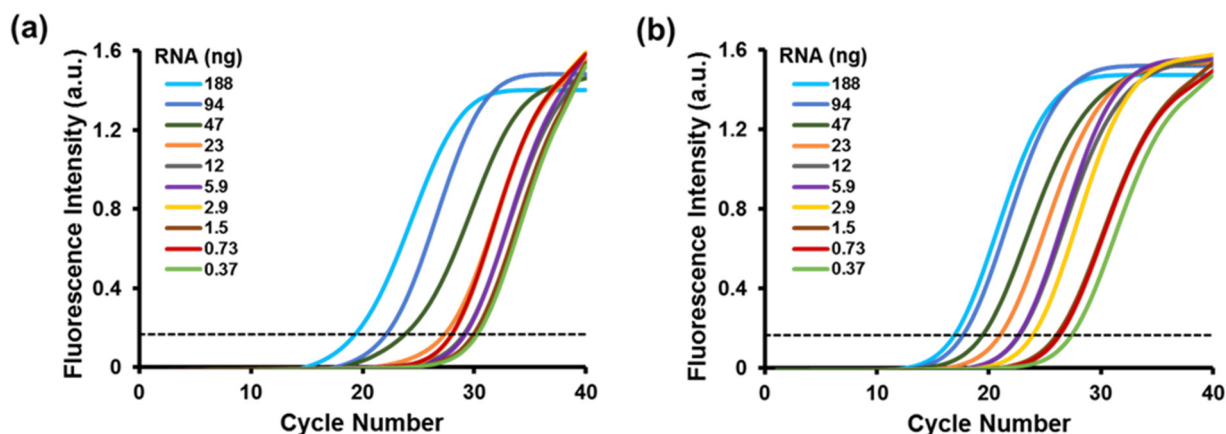

**Figure S2.** Real-time fluorescence monitoring of qPCR-amplified products with serially diluted (188 ng to 0.37 ng) target (IFZ B) RNA (a) in the absence of PEG-nGO and (b) in the presence of PEG-nGO.

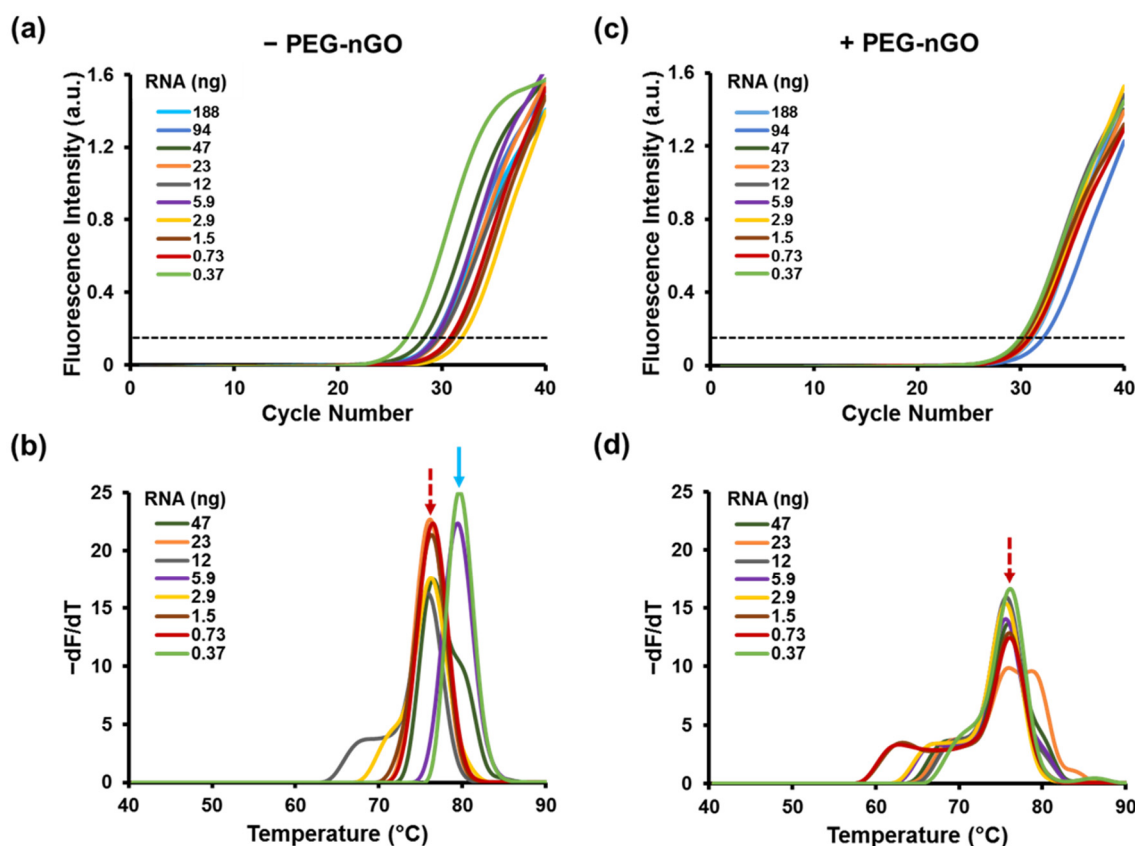

**Figure S3.** Analysis of qPCR-amplified products with non-target (IFZ A) RNA in the presence or absence of PEG-nGO. (a) Real-time fluorescence monitoring of qPCR-amplified products with serially diluted (188 ng to 0.37 ng) non-target RNA in the absence of PEG-nGO. (b) Melting curve analysis of qPCR-amplified products with serially diluted (47 ng to 0.37 ng) non-target RNA in the absence of PEG-nGO. (c) Real-time fluorescence monitoring of qPCR-amplified products with serially diluted (188 ng to 0.37 ng) non-target RNA in the presence of PEG-nGO. (d) Melting curve analysis of qPCR-amplified products with serially diluted (47 ng to 0.37 ng) non-target RNA in the presence of PEG-nGO. Red dotted arrow and cyan arrow represents nonspecific and specific amplicon dsDNA peak, respectively.
